# Supplementary material for: A crosslinked fullerene matrix doped with an ionic fullerene as a cathodic buffer layer toward high-performance and thermally stable polymer and organic metallohalide perovskite solar cells
Source: Royal Society of Chemistry journal article supplement (doi:10.1039/c5ta05057j), 2015-01-01
Supplement: c5ta05057j1.pdf [file c5ta05057j1.pdf]

## Supporting Information

### **A crosslinked fullerene matrix doped with an ionic fullerene as a cathodic buffer layer toward high-performance and thermally stable polymer and organic metalhalide perovskite solar cells**

Yi-Hsiang Chao,<sup>a</sup> Yi-You Huang,<sup>a</sup> Jen-Yun Chang,<sup>a</sup> Shih-Hao Peng,<sup>a</sup> Wei-

Yi Tu,<sup>a</sup> Yen-Ju Cheng,<sup>a</sup> Jianhui Hou,<sup>b</sup> and Chain-Shu Hsu.\*<sup>a</sup>

<sup>a</sup>Department of Applied Chemistry, National Chiao Tung University, 1001 Ta Hsueh Road Hsin-Chu, 30010 (Taiwan)

\*E-mail: [cshsu@mail.nctu.edu.tw](mailto:cshsu@mail.nctu.edu.tw)

<sup>b</sup>Institute of Chemistry, Chinese Academy of Sciences, Beijing, 100190, China

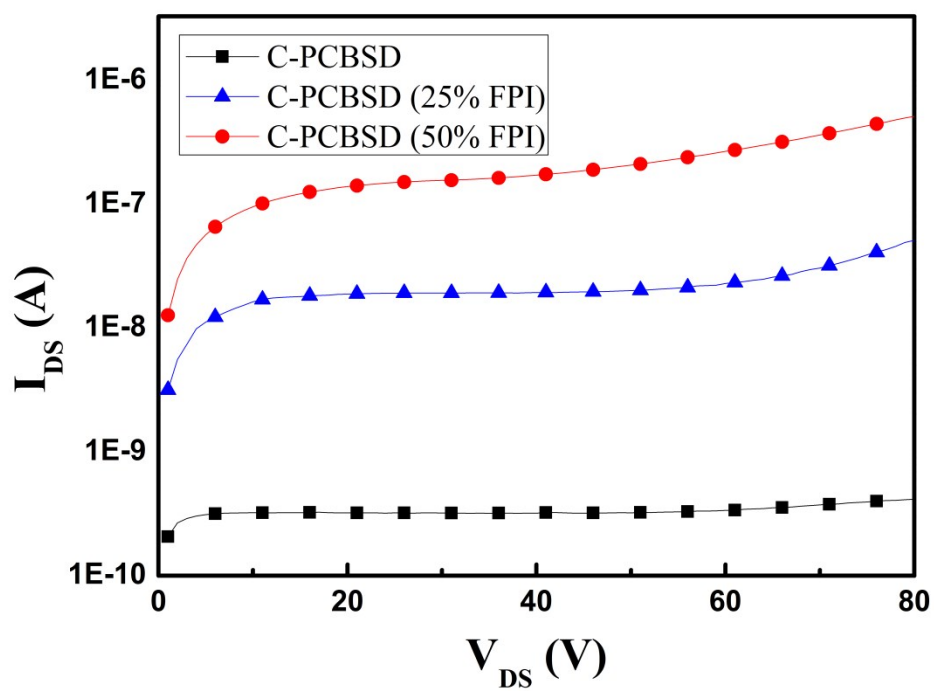

**Figure S1.** N-type OFET electrical characteristic of C-PCBSD films at varied dopant concentration

**Table S1.** Summary of OFET device performance of C-PCBSD with varying FPI dopant concentration

| Material           | Electron mobility ( $\text{cm}^2 \text{V}^{-1} \text{s}^{-1}$ ) |
|--------------------|-----------------------------------------------------------------|
| C-PCBSD            | $1.3 \times 10^{-5}$                                            |
| C-PCBSD (FPI, 25%) | $2.4 \times 10^{-5}$                                            |
| C-PCBSD (FPI, 50%) | $6.0 \times 10^{-5}$                                            |
